# Supplementary material for: Marinobazzanan, a Bazzanane-Type Sesquiterpenoid, Suppresses the Cell Motility and Tumorigenesis in Cancer Cells
Source: MDPI journal article supplement (doi:10.3390/md21030153), 2023-02-25
Supplement: s1 [file s1]

## Supporting Information

# Marinobazzanan, a Bazzanane-Type Sesquiterpenoid, Suppresses the Cell Motility and Tumorigenesis in Cancer Cell

*Sultan Pulat*<sup>1,†</sup>, *Prima F. Hillman*<sup>2,†</sup>, *Sojeong Kim*<sup>3</sup>, *Ratnakar N. Asolkar*<sup>4</sup>, *Haerin Kim*<sup>3</sup>, *Rui Zhou*<sup>1</sup>, *İsa Taş*<sup>1</sup>, *Chathurika D.B. Gamage*<sup>1</sup>, *Mucahit Varli*<sup>1</sup>, *So-Yeon Park*<sup>1</sup>, *Sung Chul Park*<sup>5</sup>, *Inho Yang*<sup>6</sup>, *Jongheon Shin*<sup>5</sup>, *Dong-Chan Oh*<sup>5</sup>, *Hangun Kim*<sup>1,\*</sup>, *Sang-Jip Nam*<sup>2,\*</sup>, and *William Fenical*<sup>4,\*</sup>

<sup>1</sup>College of Pharmacy and Research Institute of Life and Pharmaceutical Sciences, Sunchon National University, Sunchon 57922, Republic of Korea

<sup>2</sup> Department of Chemistry and Nanoscience, Ewha Womans University, Seoul 03760, Republic of Korea

<sup>3</sup> Graduate School of Industrial Pharmaceutical Sciences, Ewha Womans University, Seoul 03760, Republic of Korea

<sup>4</sup>Center for Marine Biotechnology and Biomedicine, Scripps Institution of Oceanography, University of California-San Diego, La Jolla, CA 92093-0204, USA

<sup>5</sup>Natural Products Research Institute, College of Pharmacy, Seoul National University, San 56-1, Sillim, Gwanak, Seoul 08826, Republic of Korea

<sup>6</sup>Department of Convergence Study on the Ocean Science and Technology, Korea Maritime and Ocean University, Busan 49112, Republic of Korea

\*Correspondence: [hangunkim@scnu.ac.kr](mailto:hangunkim@scnu.ac.kr) (H.K.); [sjnam@ewha.ac.kr](mailto:sjnam@ewha.ac.kr) (S.-J.N.); [wfenical@ucsd.edu](mailto:wfenical@ucsd.edu) (W.F.)

† These authors contributed equally to this work.

## Table of Contents

|                                                                                                                                                        |            |
|--------------------------------------------------------------------------------------------------------------------------------------------------------|------------|
| <b>Figure S1.</b> $^1\text{H}$ NMR spectrum (400 MHz) of marinobazzanan ( <b>1</b> ) in $\text{CD}_3\text{OD}$ . .....                                 | <b>S3</b>  |
| <b>Figure S2.</b> $^{13}\text{C}$ NMR spectrum (75 MHz) of marinobazzanan ( <b>1</b> ) in $\text{CD}_3\text{OD}$ . .....                               | <b>S4</b>  |
| <b>Figure S3.</b> COSY NMR spectrum (500 MHz) of marinobazzanan ( <b>1</b> ) in $\text{CD}_3\text{OD}$ . .....                                         | <b>S5</b>  |
| <b>Figure S4.</b> HSQC NMR spectrum (500 MHz) of marinobazzanan ( <b>1</b> ) in $\text{CD}_3\text{OD}$ . .....                                         | <b>S6</b>  |
| <b>Figure S5.</b> HMBC NMR spectrum (500 MHz) of marinobazzanan ( <b>1</b> ) in $\text{CD}_3\text{OD}$ . .....                                         | <b>S7</b>  |
| <b>Figure S6.</b> NOESY NMR spectrum (500 MHz) of marinobazzanan ( <b>1</b> ) in $\text{CD}_3\text{OD}$ . .....                                        | <b>S8</b>  |
| <b>Figure S7.</b> $^1\text{H}$ NMR spectrum (500 MHz) of <i>S</i> -MTPA ester ( <b>1a</b> ) for marinobazzanan ( <b>1</b> ) in $\text{CDCl}_3$ . ..... | <b>S9</b>  |
| <b>Figure S8.</b> $^1\text{H}$ NMR spectrum (500 MHz) of <i>R</i> -MTPA ester ( <b>1b</b> ) for marinobazzanan ( <b>1</b> ) in $\text{CDCl}_3$ . ..... | <b>S10</b> |
| <b>Figure S9.</b> The effect of various fraction of marinobazzanan ( <b>1</b> ) upon the cell viability of Caco2. ....                                 | <b>S11</b> |
| <b>Figure S10.</b> LRMS spectrum of marinobazzanan ( <b>1</b> ). .....                                                                                 | <b>S12</b> |

**Figure S1.**  $^1\text{H}$  NMR spectrum (500 MHz) of marinobazzanan (**1**) in  $\text{CD}_3\text{OD}$ .

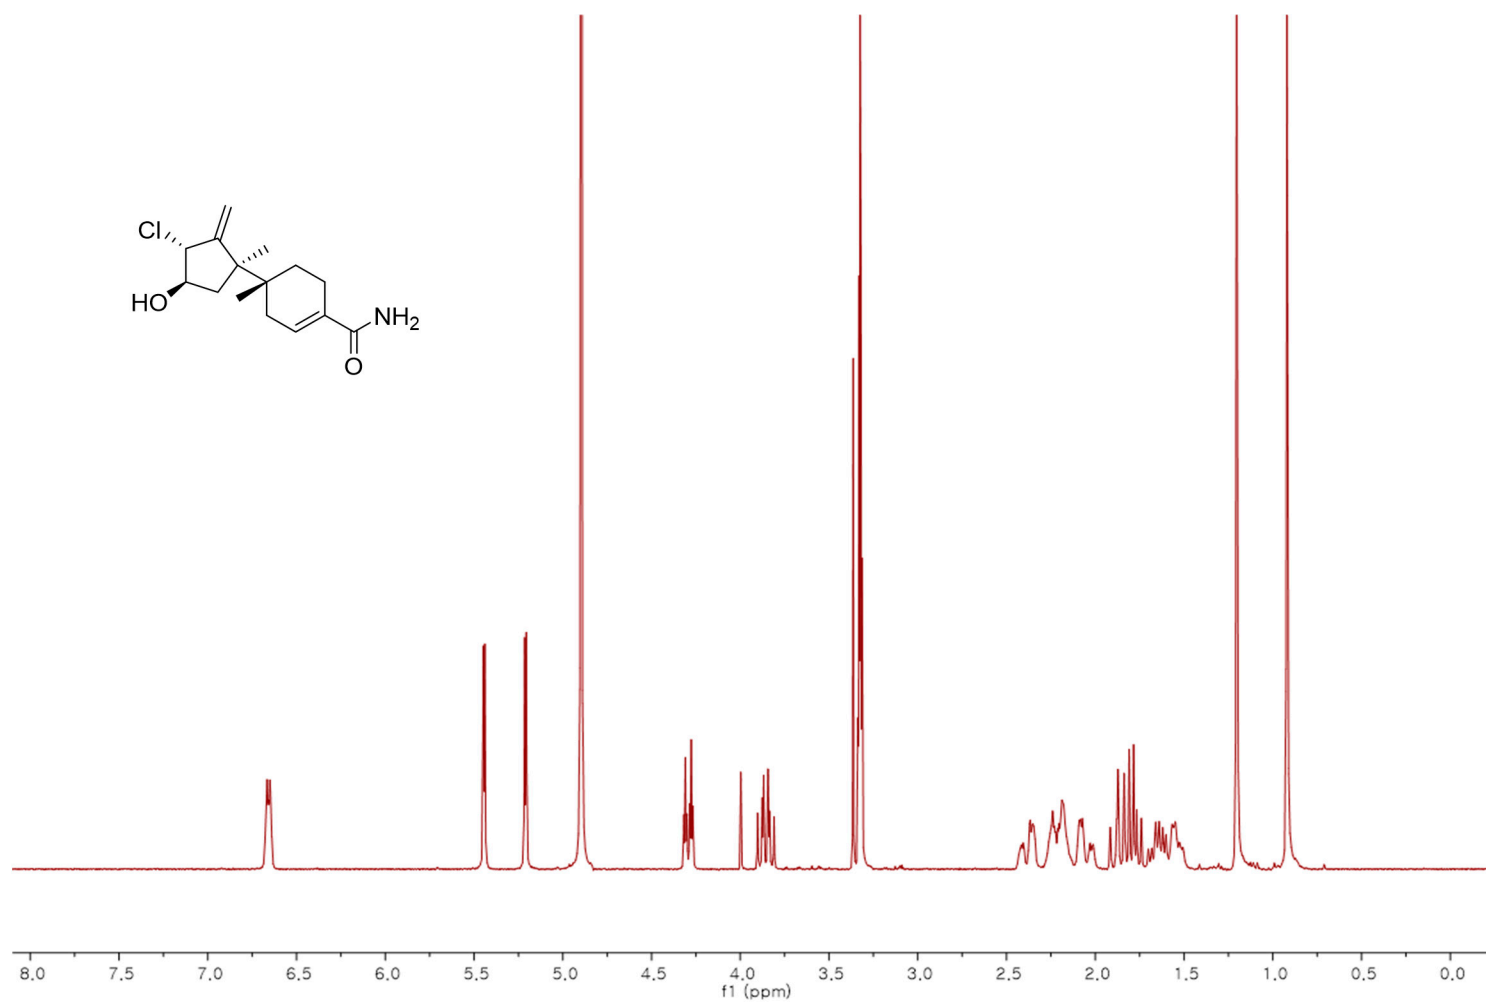

**Figure S2.**  $^{13}\text{C}$  NMR spectrum (75 MHz) of marinobazzanan (**1**) in  $\text{CD}_3\text{OD}$ .

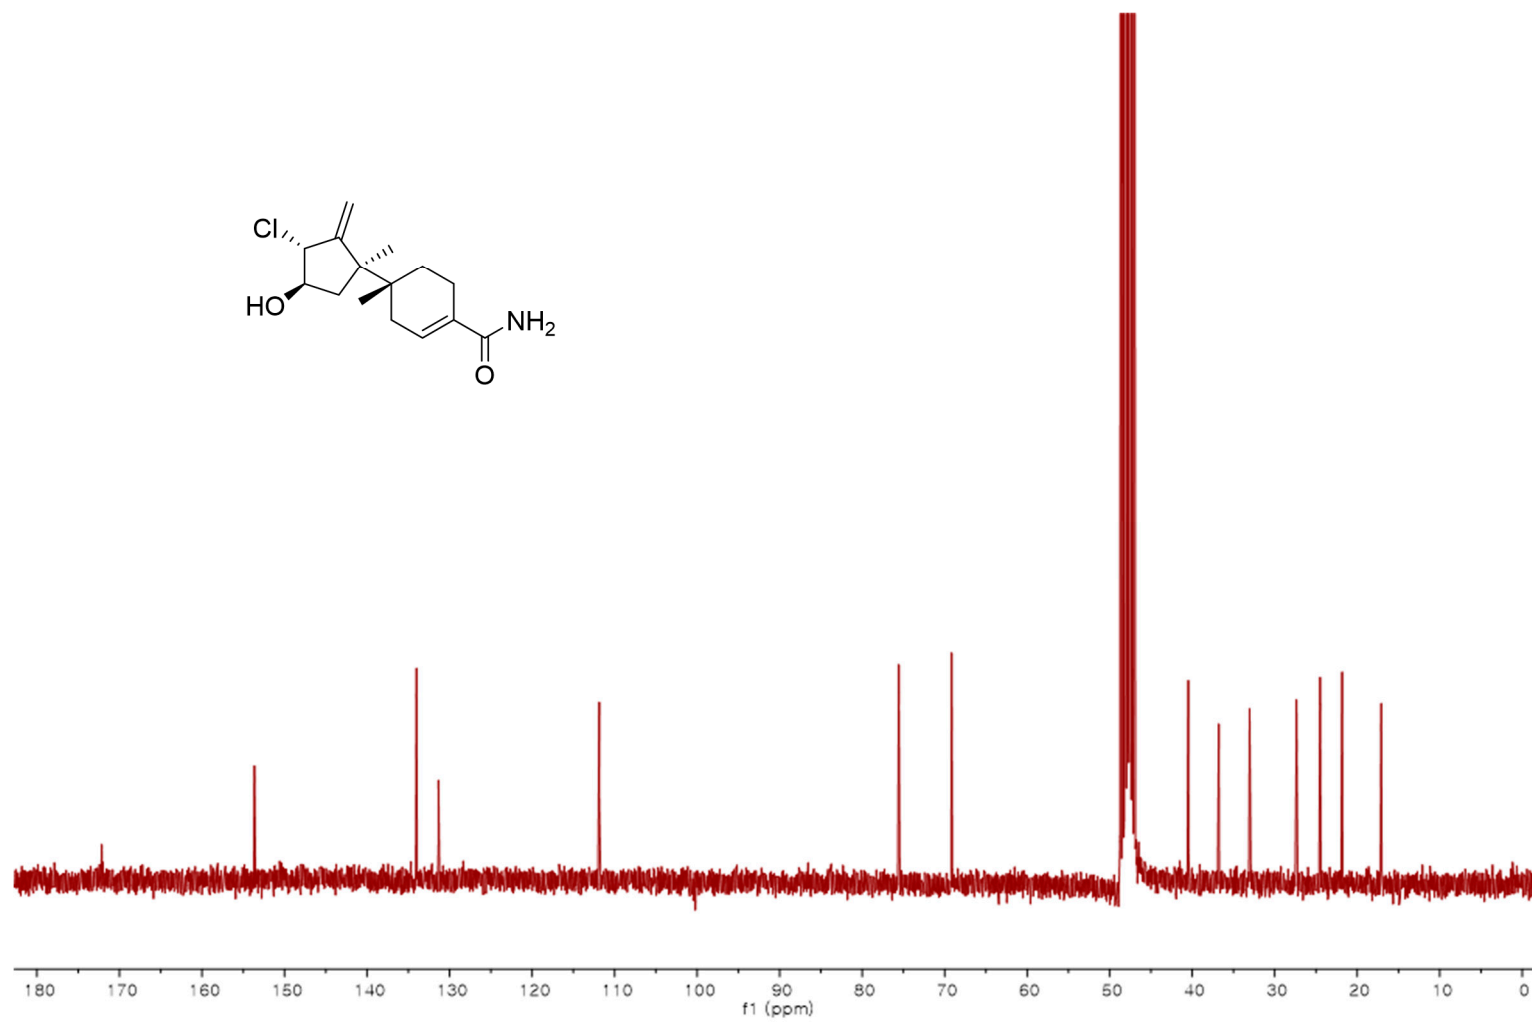

**Figure S3.** COSY NMR spectrum (500 MHz) of marinobazzanan (**1**) in CD<sub>3</sub>OD.

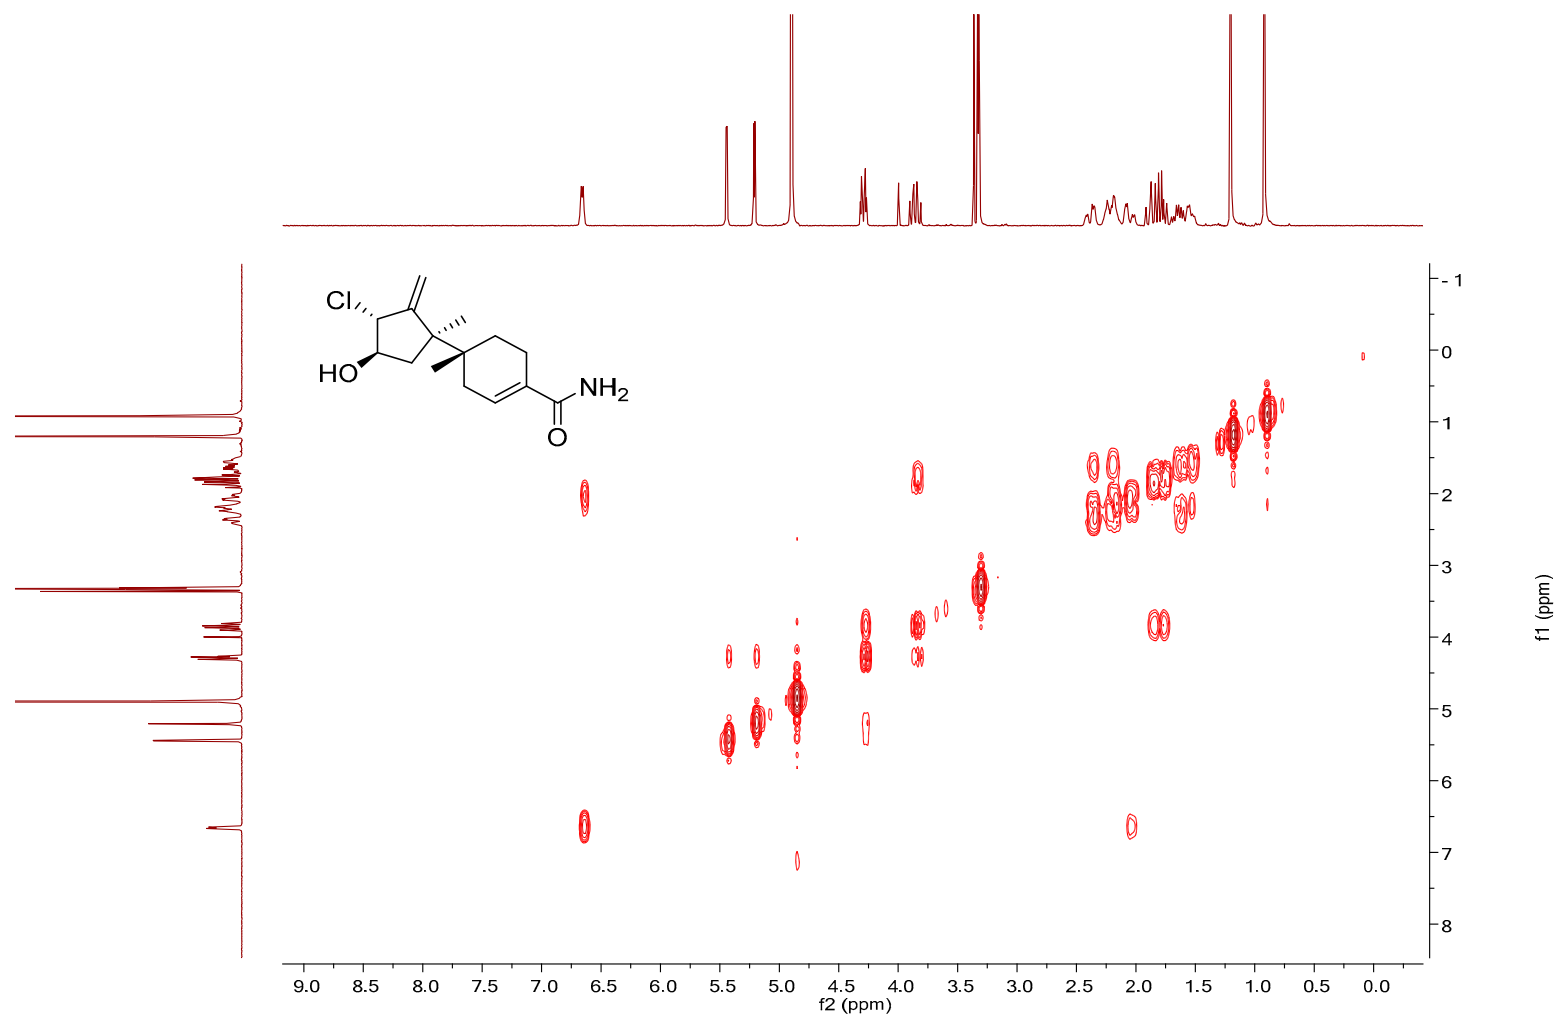

**Figure S4.** HSQC NMR spectrum (500 MHz) of marinobazzanan (**1**) in CD<sub>3</sub>OD.

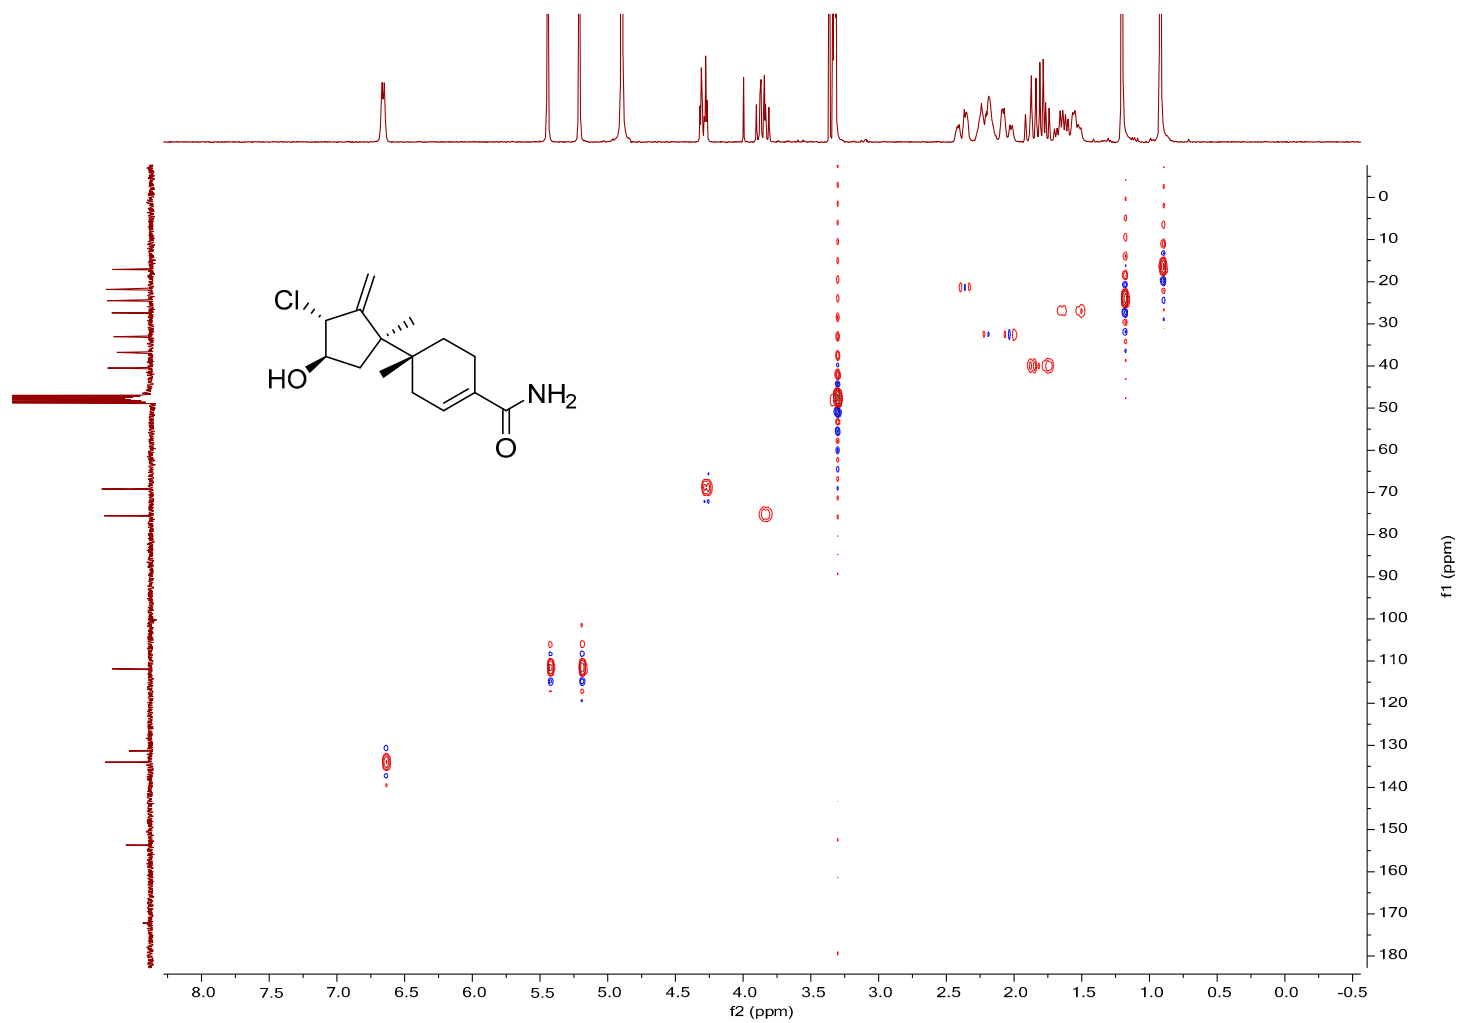

**Figure S5.** HMBC NMR spectrum (500 MHz) of marinobazzanan (**1**) in CD<sub>3</sub>OD.

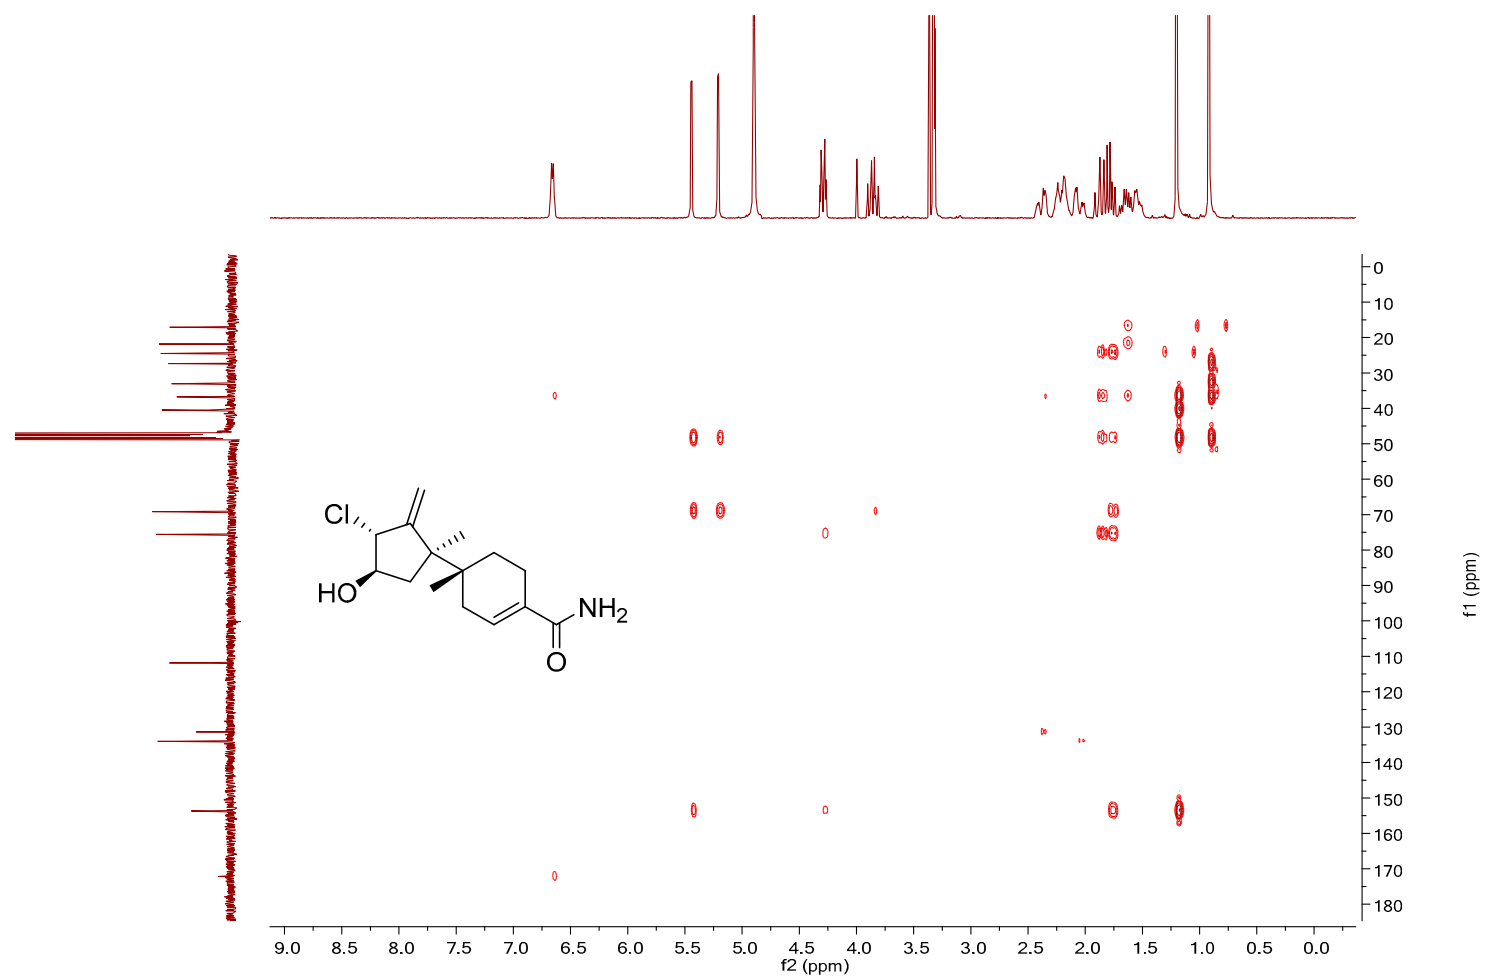

**Figure S6.** NOESY NMR spectrum (500 MHz) of marinobazzanan (**1**) in CD<sub>3</sub>OD.

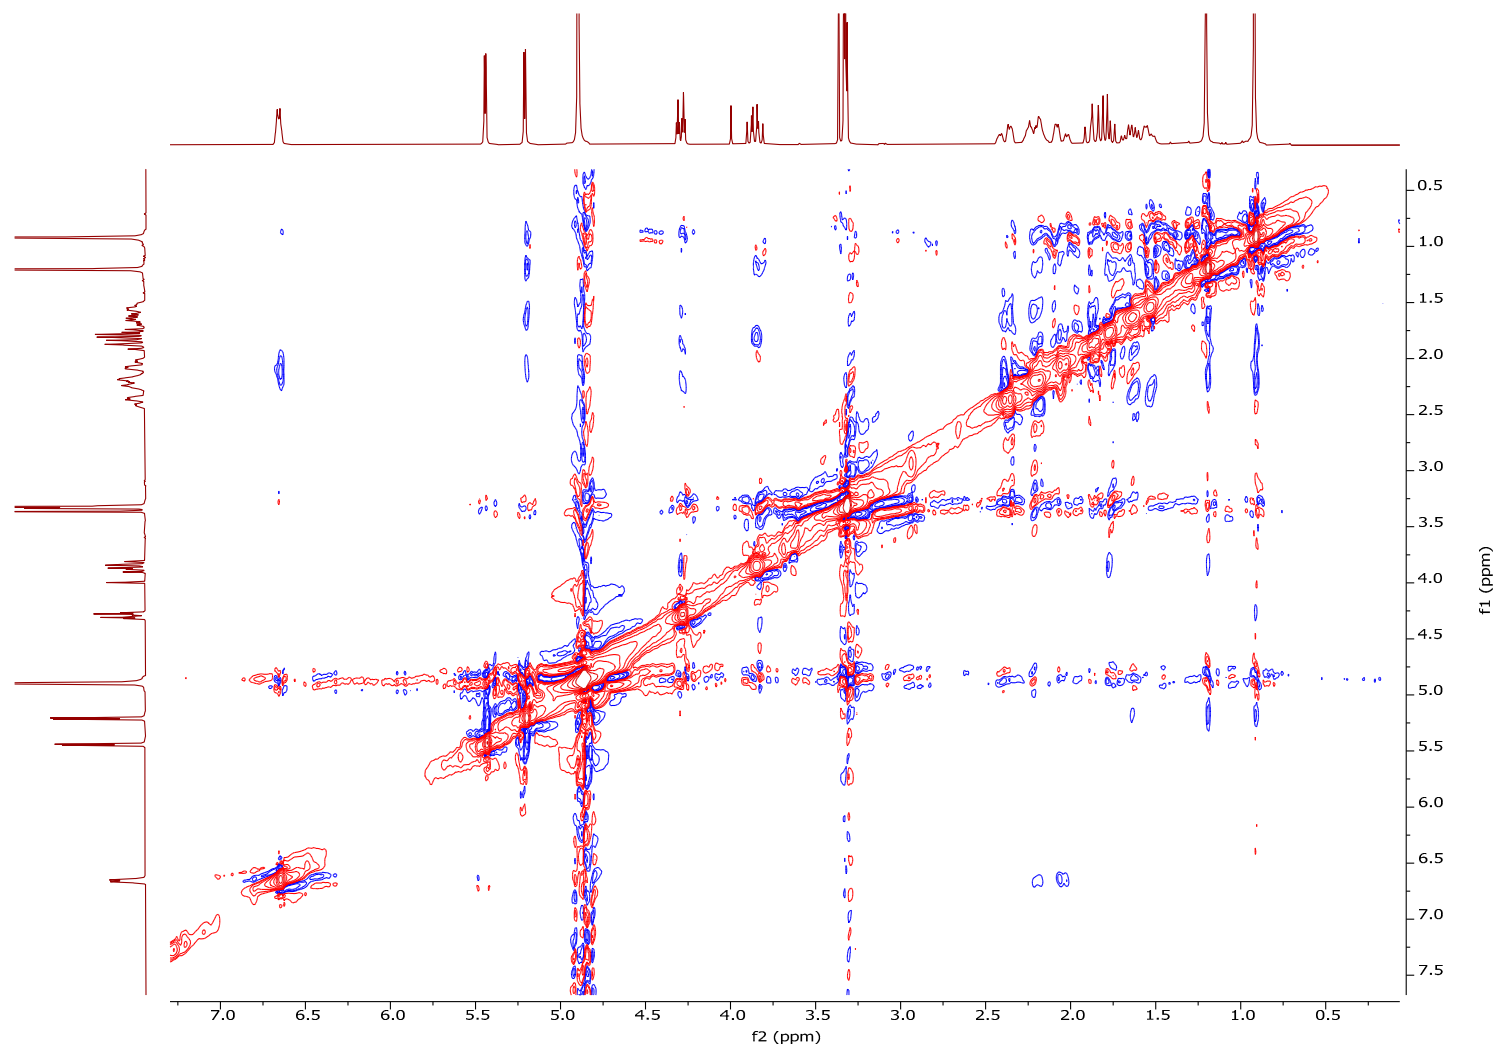



**Figure S7.**  $^1\text{H}$  NMR spectrum (500 MHz) of *S*-MTPA ester (**1a**) for marinobazzanan (**1**) in  $\text{CDCl}_3$ .

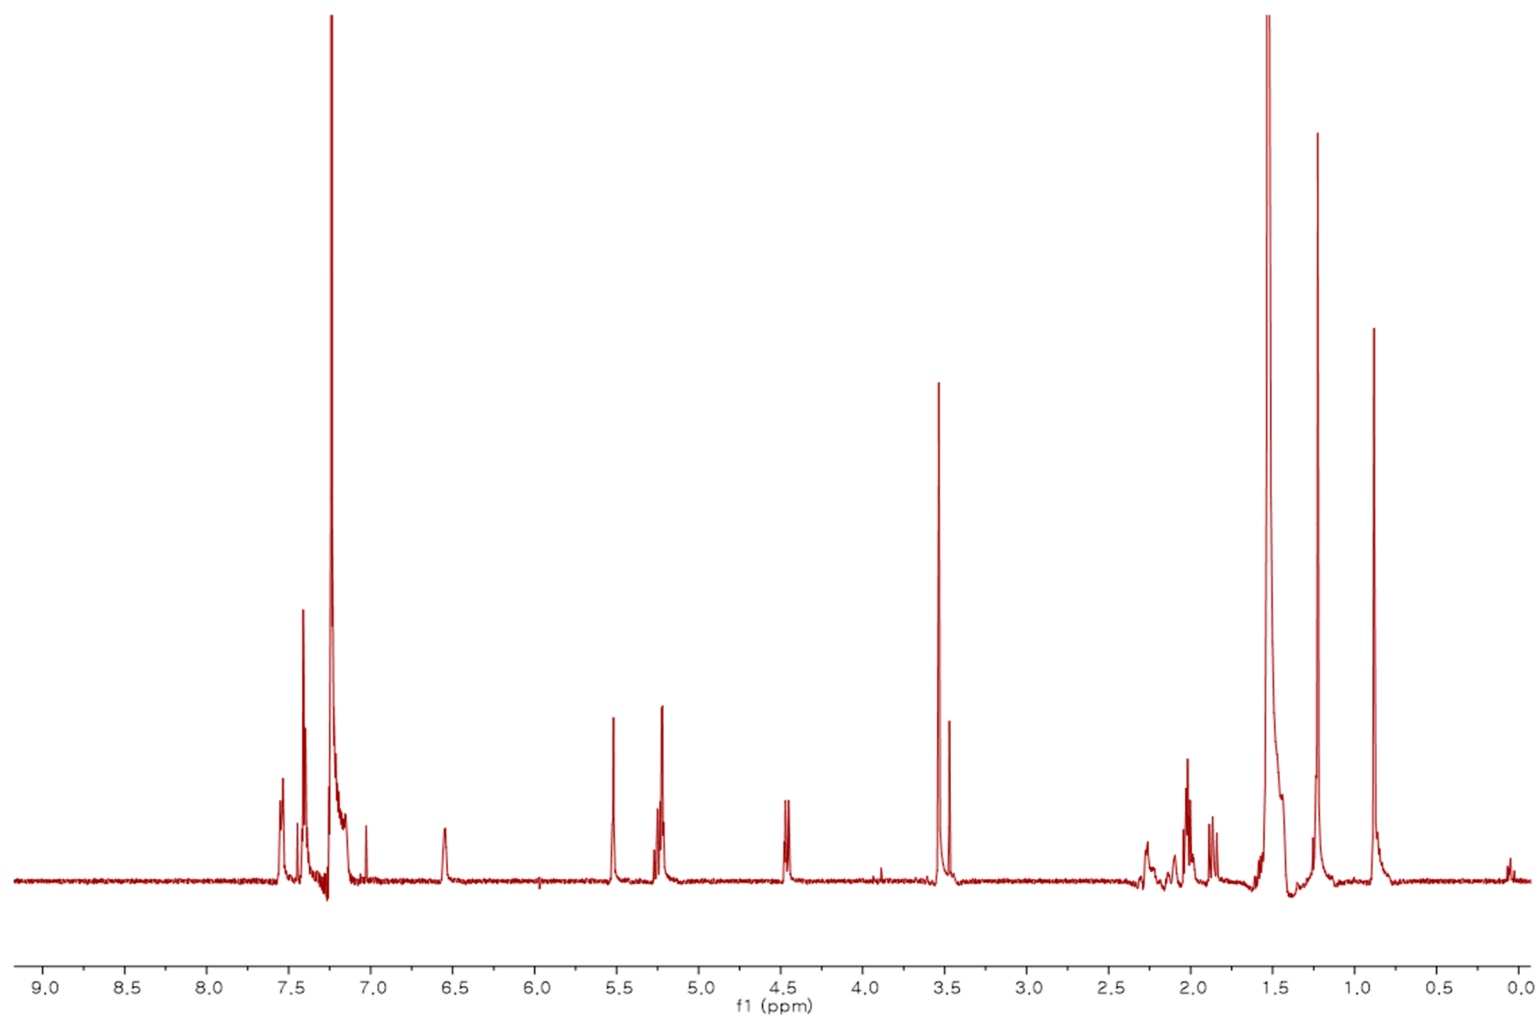

**Figure S8.**  $^1\text{H}$  NMR spectrum (500 MHz) of *R*-MTPA ester (**1b**) for marinobazzanan (**1**) in  $\text{CDCl}_3$ .

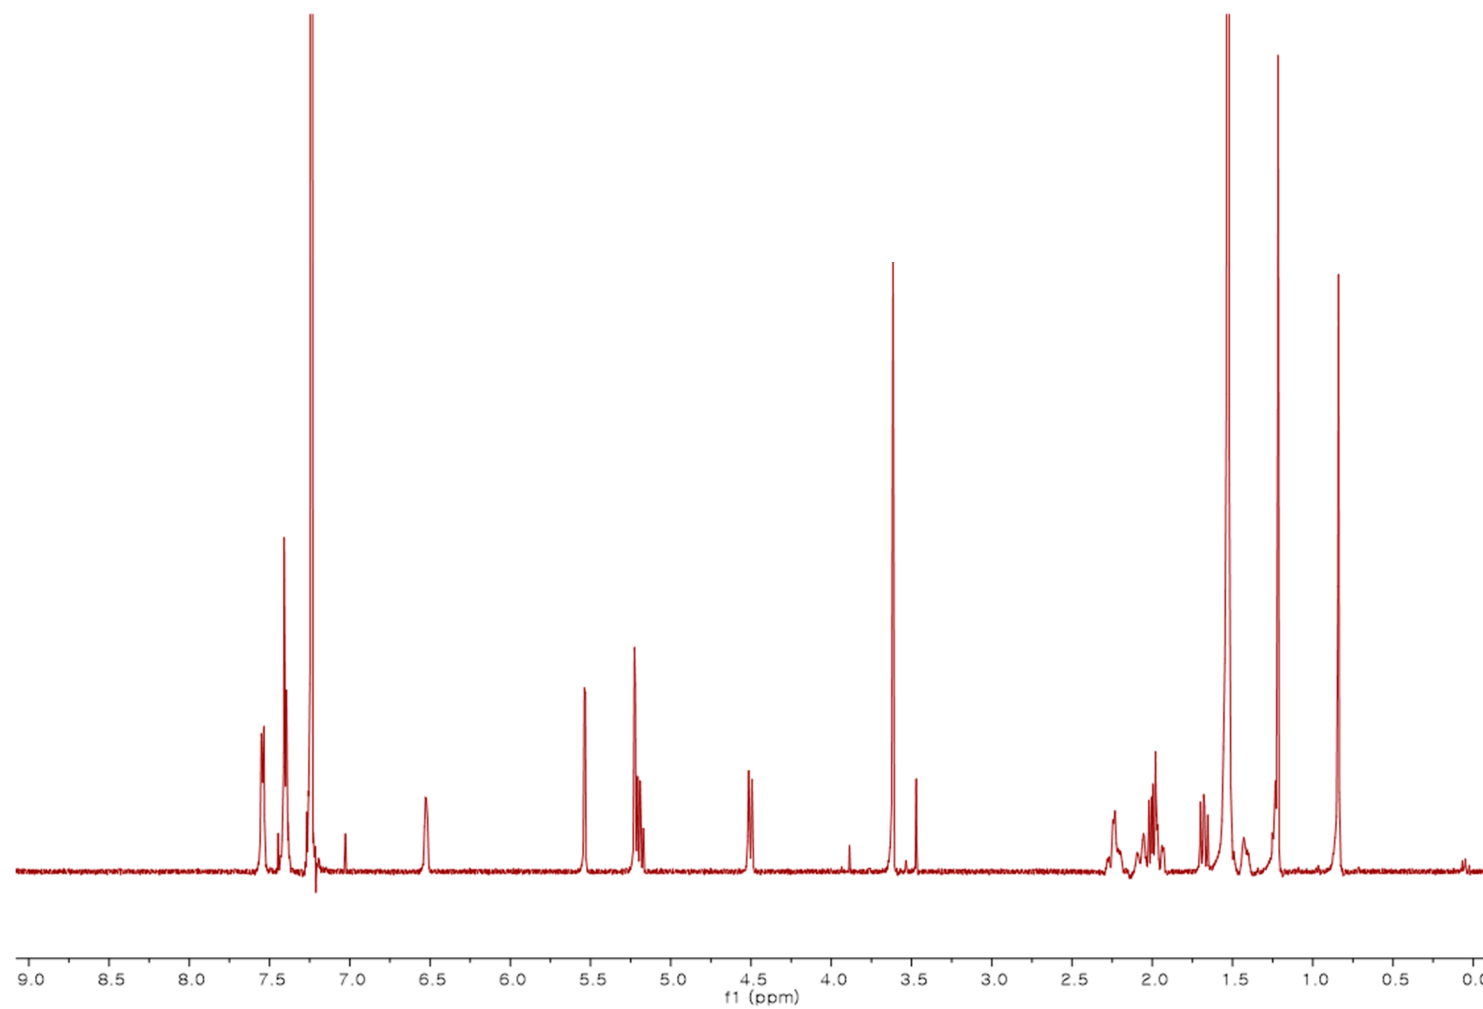

**Figure S9.** The effect of various fraction of marinobazzanan (1) upon the cell viability of Caco2.

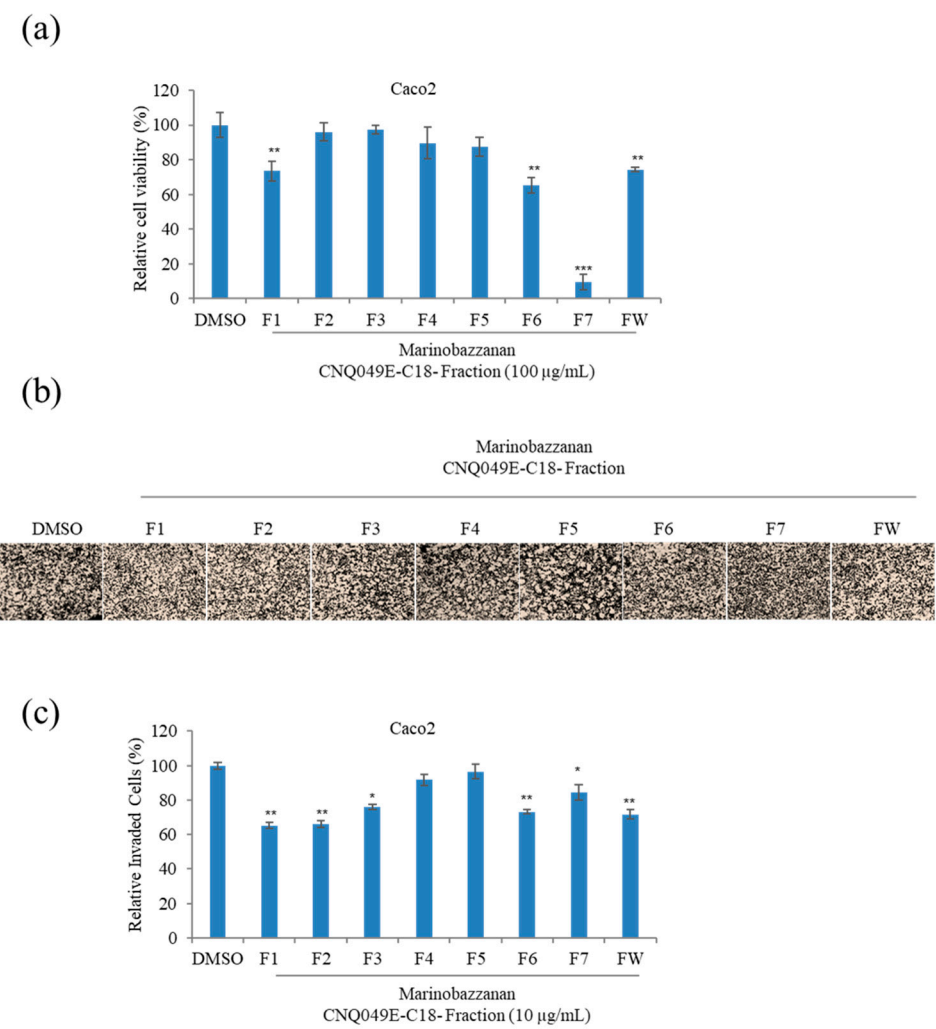

Figure S10. LRMS spectrum of marinobazzanan (1).

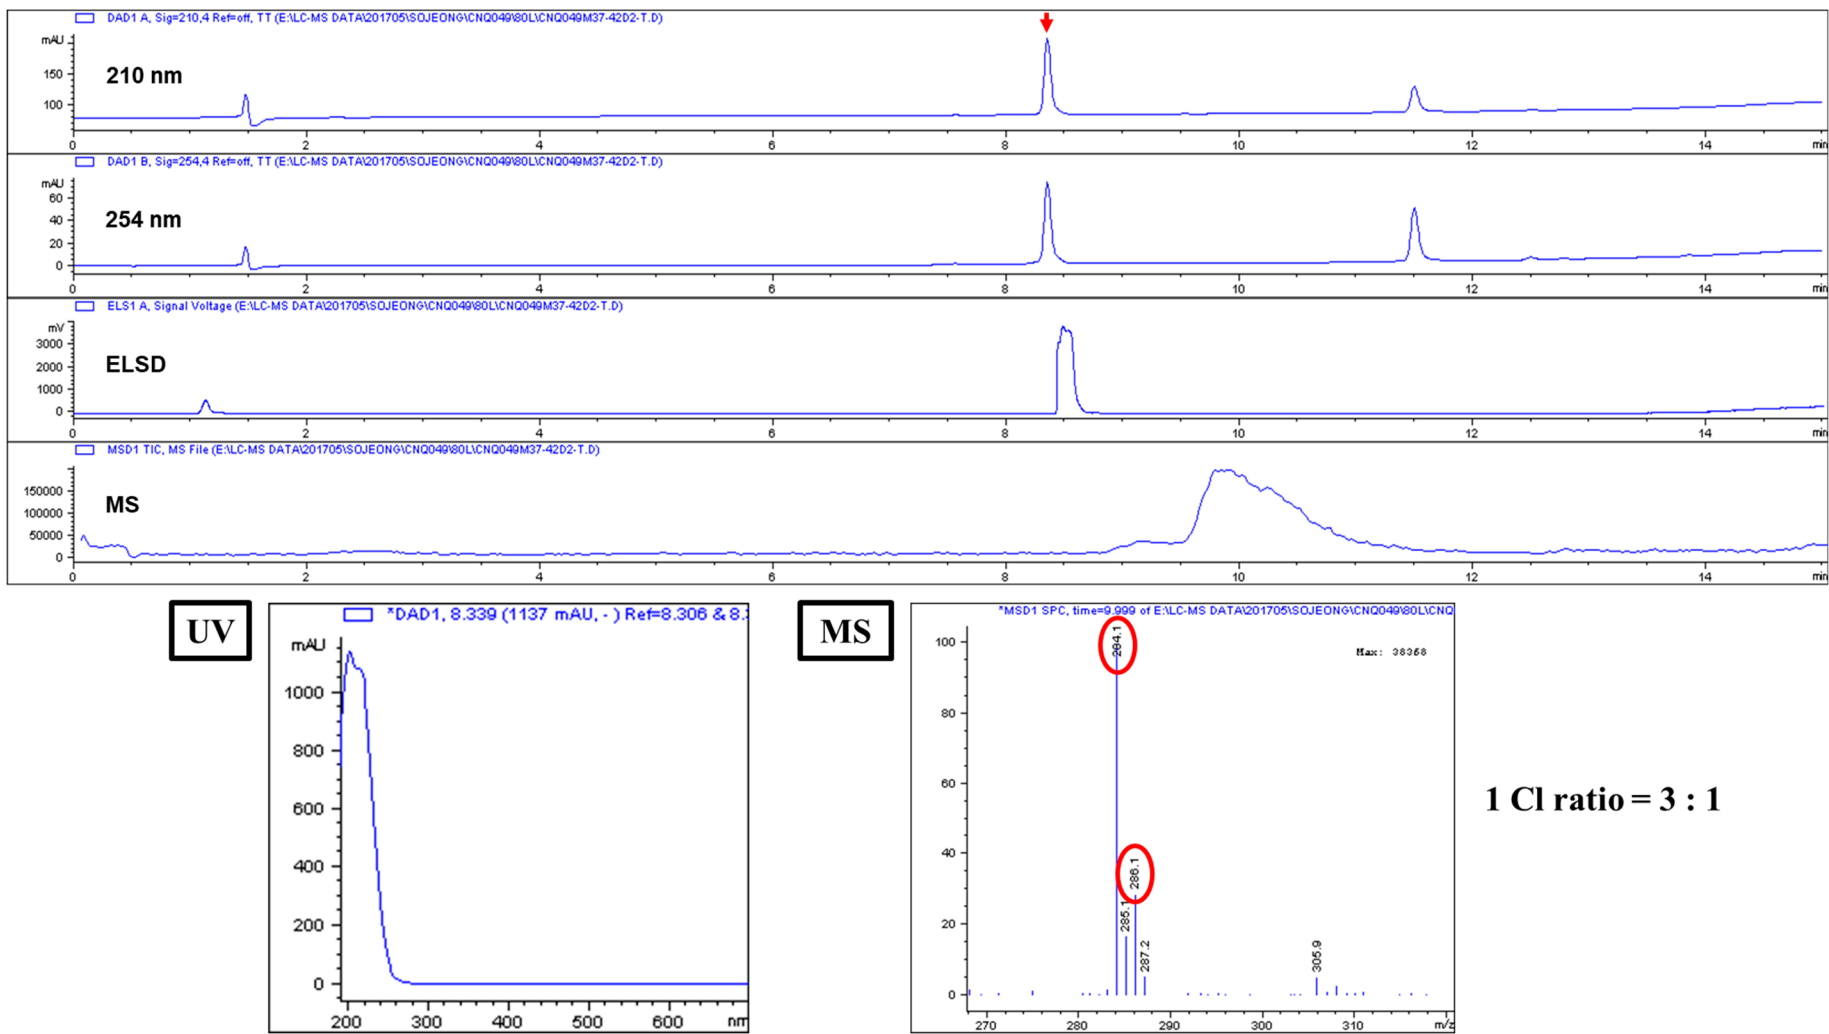

1 Cl ratio = 3 : 1
